## **The Pebble/Rho1/Anillin pathway controls polyploidization and axonal wrapping activity in the glial cells of the *Drosophila* eye**

Lígia Tavares<sup>1,2\*</sup>, Patrícia Grácio<sup>1,2</sup>, Raquel Ramos<sup>1,2</sup>, Rui Traquete<sup>1,2</sup>, João B. Relvas<sup>1,2</sup>, Paulo S. Pereira<sup>1,2\*</sup>

<sup>1</sup>i3S – Instituto de Investigação e Inovação em Saúde, Universidade do Porto, Portugal

<sup>2</sup>IBMC – Instituto de Biologia Molecular e Celular, Universidade do Porto, Portugal

\* Co-corresponding authors:

E-mail: paulop@ibmc.up.pt

E-mail: ligia.tavares@ibmc.up.pt

Tel: 00351 220 408 800

## Abstract

During development glial cells are crucially important for the establishment of neuronal networks. Proliferation and migration of glial cells can be modulated by neurons, and in turn glial cells can differentiate to assume key roles such as axonal wrapping and targeting. To explore the roles of actin cytoskeletal rearrangements in glial cells, we studied the function of Rho1 in *Drosophila* developing visual system. We show that the Pebble (RhoGEF)/Rho1/Anillin pathway is required for glia proliferation and to prevent the formation of large polyploid perineurial glial cells, which can still migrate into the eye disc if generated. Surprisingly, this Rho1 pathway is not necessary to establish the total glial membrane area or for the differentiation of the polyploid perineurial cells. The resulting polyploid wrapping glial cells are able to initiate wrapping of axons in the basal eye disc, however the arrangement and density of glia nuclei and membrane processes in the optic stalk are altered and the ensheathing of the photoreceptor axonal fascicles is reduced.

## Introduction

In the context of a growing nervous system, neurons, glia, and their precursor cells tightly coordinate cell proliferation and migration. During *Drosophila* larval eye development, perineurial glia (the outermost glia subtype) migrate from the optic lobe towards the optic stalk and the basal surface of the eye disc, along the two subperineurial glial cells<sup>1</sup>. Migration of perineurial glia into the eye disc is abrogated if the expression of the  $\alpha$ PS2/ $\beta$ PS integrin heterodimer is repressed, causing a loss of focal adhesions and a reduction in the stiffness of the extracellular matrix layer (neural lamella)<sup>2-4</sup>. Once perineurial glia contacts the differentiating photoreceptor axons they differentiate into wrapping glia and extend their processes back toward the CNS, ensheathing the axonal fascicles<sup>1,2,5</sup>. During the growth of the nervous system perineurial glia proliferate extensively<sup>6,7</sup>, and their cell number in the eye disc is positively controlled by the FGF/Pyramus and Dpp pathways, and by the cell autonomous functions of the Yorkie/Yap, Myc, Dref, and Pdm3 transcription factors<sup>8-11</sup>. In contrast, subperineurial glial cells increase their individual cell size by endoreplication, undergoing both endocycles and endomitosis, and the increased surface area allows for a correct formation of the blood-brain barrier (BBB)<sup>12-14</sup>. Glia migration and differentiation are tightly regulated by photoreceptor precursors fitness and differentiation states<sup>9,15</sup>. This controlled process allows wrapping glia to perform the ensheathment of newly differentiated axons<sup>15-17</sup>.

By regulating the actin cytoskeleton, the Rho GTPases (RhoA, B and C in vertebrates, and Rho1 in *Drosophila*) have key roles in multiple processes, including cell migration and epithelial morphogenesis, mitosis and cytokinesis<sup>18-21</sup>. However their functions in glial cells are yet poorly characterized. RhoA was shown to promote *in vitro* proliferation of PNS Schwann cells through AKT activation<sup>22</sup>, and differentiation through the repression of JNK pathway, and both roles were independent of its downstream effector ROCK<sup>23</sup>. In contrast, RhoA activity inhibited differentiation of oligodendrocytes<sup>24</sup> and rescued proliferation of oligodendrocyte precursor cells in *gpr56<sup>stl13/stl13</sup>* mutant zebrafish<sup>25</sup>. In the *Drosophila* PNS, Rho1 was shown to control actin rearrangement as overexpression of constitutively-active Rho1<sup>V14</sup> in glia caused stalling of cell bodies and inhibited peripheral extension of cell processes<sup>26,27</sup>. However, glial expression of dominant-negative Rho1<sup>N19</sup> (Rho1<sup>DN</sup>) in peripheral glia caused minor glial and axonal phenotypes<sup>26,27</sup>, preventing a more complete characterization of the functions of Rho1 in glia-neuron crosstalk. In here, we used the *Drosophila* eye imaginal disc to address the role of Rho1 in retinal glia development and ommatidial axon wrapping. We show that glia-targeted Rho1 knockdown led to perineurial glia migration and proliferation defects. Surprisingly, perineurial glia became more adaptable, displaying an increased ploidy and cell membrane area, maintaining the ability to cover the photoreceptor differentiated domain. However, even though perineurial glial cells initiate differentiation and axonal wrapping in the eye disc proper, in the optic stalk Rho1 repression blocks complete wrapping of 8-axons ommatidial fascicle.

### **Repression of the Pebble/Rho1/Anillin genetic pathway in the eye disc glia causes a switch from mitosis to endoreplication**

To determine if Rho1 regulates glia development in the developing *Drosophila* eye (Fig. 1A – C), we expressed both Rho RNAi and dominant-negative Rho1 (Rho1<sup>DN</sup>) using the pan-glial *repo*-Gal4 driver (Fig. 1D-F'). Rho1 loss-of-function (LOF) induced a dramatic reduction in retinal glia numbers in third-instar eye discs (from 147 to 29, n=10-19 eye discs, p<0.0001) (Fig. 1G). The reduction of Rho1 function did not interfere with the dispersion of glial cells through their target migration domain. Similar to the control, the total glia extension of CD8-GFP tagged membranes spread evenly to occupy the posterior region of the photoreceptor differentiation domain (Fig. 1D-F). In contrast, this adaptability was not observed in the non-glial cells of the eye disc, as *ey*-Gal4 driven expression of *Rho1* RNAi caused severe reductions in disc size, apoptosis/cell death and interference with photoreceptor differentiation (Fig. S1).

Therefore, we investigated the mechanism for the compensatory response in glia. Glia nuclear area, defined by the expression of the glia-specific transcription factor Repo, was significantly increased upon Rho1 knockdown (Fig. 1D-F). Furthermore, glial cell ploidy was also highly increased to an average of 15n, ranging from 8n to 25n (Fig. 1H). In control discs only the two subperineurial glial cells were significantly polyploid (10n), as previously described<sup>1,12-14</sup>. This ability of Rho1 depleted glial cells to compensate for a reduced number and sustain a normal domain of association to neurons is not a general phenomenon. Other conditions where the number of glial cells in the eye disc is reduced, such as glial-specific knockdown of integrin  $\alpha$ PS2 failed to display adaptability<sup>2</sup>. Nevertheless, a similar phenotype has been observed upon overexpression of the E3 ubiquitin ligase Fizzy related (Fzr) protein in perineurial glia<sup>1</sup>. Rho1 knockdown caused high adult lethality (Fig. 1I), which could be due to its role in maintaining the integrity of the blood-brain barrier<sup>28</sup>.

We next aimed to identify the pathway of Rho1 upstream regulators and downstream effectors required to prevent polyploidization of eye disc glial cells. Rho guanine nucleotide exchange factors (RhoGEFs) regulate the activation of Rho family members. Pebble (Pbl), the fly ortholog of vertebrate ECT2, is essential for the formation of a contractile ring and the initiation of cytokinesis, acting at the cell cortex as a Rho-specific RhoGEF<sup>29</sup>. Human Ect2 also activates RhoA at the onset of mitosis to induce the actomyosin remodelling that drives both mitotic rounding and cortical stiffening<sup>30,31</sup>. Interestingly, in a similar manner to Rho1 knockdown, expression of a UAS-*pebble(pbl)* RNAi construct with *repo*-Gal4 led to a reduction in number and polyploidization of glial cells in the eye disc (Fig. 2A, compare with Control Fig. 1D). In contrast, neither RhoGEF2, a regulator of cell shape changes during *Drosophila* embryogenesis<sup>32,33</sup>, nor the single *Drosophila* Rho GDP dissociation inhibitor (RhoGDI)<sup>34</sup> were required for the control of proliferation/polyploidization in glial cells (Fig. 2B, C). Phenotypes for all the genes tested in this study were confirmed by using at least a second nonoverlapping RNAi line. Pebble(RhoGEF)/Rho GTPase control several pathways during cytokinesis including the recruitment of the formin Diaphanous to the equatorial cortex to stimulate F-actin assembly<sup>35</sup>, and the activation of Rok/ROCK (Rho-associated protein kinase) and Citron Kinase, which activate non-muscle myosin II<sup>36-38</sup>. Interestingly, we observe that anillin a scaffolding protein, encoded by *scra*, which links contractile elements within the furrow to the plasma membrane and to microtubules<sup>39-41</sup> was required for glial ploidy control (Fig. 2D), while ROCK was not (Fig. 2E, F). The latter result is in accord with a more crucial role for Citron Kinase than for

ROCK during cytokinesis<sup>42</sup>. Overall, we showed that the Pebble(RhoGEF)/Rho1/Anillin pathway regulates the ploidy level of retinal glia in the eye disc.

### **Regulation of the glia-specific Rho1 knockdown phenotype by JNK, Yki and Myc pathways**

While the formation of polyploid cells has been implicated in genomic instability and cancer<sup>43</sup>, it is also a physiological mechanism associated to the differentiation of some cell types, such as megakaryocytes that undergo endomitosis as a failure of late cytokinesis caused by defects in the contractile ring and Rho GTPase signalling<sup>44,45</sup>. In the highly proliferative *Drosophila* wing disc, cytokinesis failure induced by knockdown of the Septin peanut (pnut) caused the formation of tetraploid cells and massive apoptosis that was dependent on Jun N-terminal kinase (JNK) activity<sup>46</sup>. Interestingly, in Rho1-knockdown glial cells the resulting increase in ploidy is not significantly rescued by the co-expression of a dominant-negative version of JNK (bsk<sup>DN</sup>; Fig. 2G), and it does not lead to apoptosis, evaluated by Caspase3 activation (Fig. 2H-I). This further supports that some cell types such as retinal glial cells tolerate Rho1 knockdown or cytokinesis failure better than wing or eye imaginal disc cells (Fig. S1). We next evaluated the contribution of proliferation defects to the reduced number of glial cells in *repo>Rho1* RNAi discs. In comparison to controls, we detected reduced incorporation of 5-Ethynyl-2'-deoxyuridine (EdU) by Rho1-knockdown glial cells in the eye disc (Fig. 2 J-K'). On one hand this suggests that the increase in ploidy also occurs in retinal glial cells after their migration from the optic stalk. This is also supported by the detection of pH3-positive large polyploid cells that progressed to mitosis (Fig. S2), revealing that at least a fraction of the cells undergoes an endomitotic type of endoreplication cell cycle. On the other hand, the resulting polyploid cells have diminished DNA replication (Fig. 2J-K'), so the function of other factors could be at play to modulate cell proliferation and genome instability. We investigated the consequences of overexpressing an activated form of the transcriptional coactivator Yorkie (Yki), which have been shown to induce polyploidization to drive tumour progression<sup>47</sup> and in response to cytokinesis failure<sup>46</sup>, or Myc that is required and sufficient for endoreplication in response to tissue injury<sup>48</sup>. Co-expression of Myc and Yki<sup>ACT</sup> together with Rho1 RNAi in glial cells caused a strong but variable increase in ploidy, but it did not change the migration and dispersion of Rho1 knockdown glial cells in the eye disc or caused tumorigenesis (Fig. 2L-M compare with Fig. 1E). Thus our results suggest that polyploid glial cells in the eye disc do not strongly enforce a cell cycle block as other polyploid cell types do<sup>49</sup>, resembling polyploid

megakaryocytes where this link is not present, allowing for Yap/Yki- and Myc-dependent polyploidization, differentiation and platelet formation<sup>50</sup>.

### **Rho1 functions in perineurial glia to inhibit eye disc glia polyploidization**

To further understand which glia subtypes require Rho1 function to control eye disc glia number and ploidy, we analysed Rho1 expression in the different glia layers. We used an anti-Rho1 antibody (Fig. S3A, B), and a GFP trap inserted in the Rho1 gene (encoding *Rho1-GFP*; Fig. S3C). The expression patterns obtained with both approaches were very similar. Rho1 was detected in subperineurial glial cells and in perineurial glia. Next, we induced Rho1 inhibition using glia-subtype specific drivers. When dominant-negative Rho1<sup>DN</sup> is expressed under the control of a subperineurial-specific driver, (*moody-GAL4*)<sup>51,52</sup>, no significant change in the ploidy of glial cells in the eye disc was observed (Fig. 3A, B). However, when Rho1<sup>DN</sup> was expressed specifically in perineurial glia using the C527 driver<sup>5</sup>, the main features of pan-glia Rho1 depletion were recapitulated. Mainly, the number of glia in the eye disc was markedly reduced and its nuclear size significantly increased (Fig. 3C, D, arrowheads). The nuclear size was already increased when cells entered the optic stalk to migrate toward the eye disc (Fig. 3D, arrowheads). Interestingly, the glia nuclear size in the optic lobes was less affected (Fig. 3C, D, asterisks). Wrapping glia is the third glia subtype identified in the eye imaginal disc. When Rho1 was depleted using a wrapping glia-specific driver (*Mz97-GAL4*),<sup>5</sup> we detected no significant differences in cell numbers of total glia and differentiated wrapping glia, nor in nuclear sizes (Fig. 3E-G). Thus, Rho1 is not required for the maintenance of a differentiated and diploid status in wrapping glia. To exclude the possibility that using the *Mz97-GAL4* driver significant inhibition of Rho1 is only achieved after cells are already committed to differentiation, we evaluated differentiation upon earlier and pan-glia Rho1 repression using *repo-Gal4* and the *sprouty-lacZ* differentiation marker<sup>53</sup>. Interestingly, we detected expression of *sprouty-lacZ* in a large subset of the polyploid glial cells induced by Rho1 knockdown (Fig. 3H, I). In fact, the percentage of differentiated wrapping glial cells increases from 49 % in control to 69 % in Rho1 RNAi (Fig. 3J). Thus, our results suggest that Rho1 knockdown in perineurial glia induces polyploidization, but subsequently Rho1 is not required for the commitment of polyploid cells to the wrapping glia fate.

## **Rho1-depleted glia initiate axonal wrapping but fail to complete ensheathment of 8-axons fascicles**

In control eye discs, differentiated wrapping glia contact and initiate wrapping of nascent photoreceptor axons<sup>1,2</sup> (Fig. 4A). However, when we expressed Rho1 RNAi we observed a decrease in the total number of wrapping glia nuclei in the eye disc and in the optic stalk (Fig. 4B). To evaluate if axonal wrapping is regulated by Rho1, we first analyzed glia membranes through the expression of the membrane marker CD8-GFP. This analysis showed that in the eye disc Rho1-depleted glia is still capable of extending membrane projections to initiate axonal wrapping in a similar fashion to control, with axons projecting to the optic stalk (Fig. 4C, D). Further analysis of the optic stalk showed that photoreceptor axons are less physically insulated from hemolymph in Rho1 RNAi, being closer to the Laminin-rich neural lamella, due to the reduction in glial nuclei and membrane extension (Fig. 4E-J). By transmission electron microscopy (TEM) it is possible to visualize two glial cell layers between the photoreceptor axons and the ECM corresponding to the subperineurial cells and the more external perineurial glia (Fig. 4K). In Rho1 RNAi optic stalks only one glial cell layer was visible in some regions (Fig. 4L). This result is in agreement with the recent report of a role for Rho1 in the integrity of the blood-brain barrier<sup>28</sup>, and could potentially explain the high lethality observed (Fig. 1I). Interestingly, while in the controls most clusters of eight ommatidial axons are wrapped as one fascicle (Fig. 4M)<sup>1,2</sup>, in Rho1 RNAi we observe fewer wrapping glia processes and a significant reduction in the ensheathment of 8-axons ommatidial fascicles (Fig. 4N). The decreased fasciculation is also observed by immunofluorescence, where axonal staining appears less condensed (Fig. 4I – J).

Overall, our results show that Pebble(RhoGEF)-Rho1-Anillin are specifically required in perineurial glia to limit polyploidization, and that glial cells display high plasticity and adaptability to the polyploid status being able to differentiate and to initiate photoreceptor axonal wrapping. However, Rho1 function is necessary for the later ensheathment of 8-axons fascicles and viability, which is a question that will be interesting to approach in future work.

## Material and Methods

### Fly husbandry

Most crosses were raised at 25 °C under standard conditions. The following stocks (described in FlyBase, unless stated otherwise) were used: *repo*-Gal4, *c527*-Gal4<sup>5</sup>; *moody*-Gal4<sup>51,52</sup>, *repo4.3*>CD8GFP (*moody*-Gal4 and *repo4.3*-Gal4 were gifts from Christian Klämbt, University of Münster); UAS-*Dcr-2*, Mz97-GAL4, UAS-Stinger (BDSC\_#9488)<sup>5</sup>, Rho1-GFP (ZCL1957) UAS-*Rho1*<sup>DN19,1.3</sup> (BDSC\_#7327)<sup>54</sup>, UAS-*Rho1* RNAi (BDSC\_#29002 in Fig. 3 H-I, elsewhere: BDSC\_#27727), UAS-*pebble* (#109305 and #35349), UAS *RhoGEF2* RNAi (#34643, #31239, #10577), UAS *RhoGDI* RNAi (46155, #105765), UAS *scra* RNAi (#53358), UAS Rok RNAi (#3793, #104675, #3797), UAS *Rok*<sup>CAT</sup> (#6668, #6669), UAS-lacZ, UAS *yki*<sup>ACT</sup> (#28817), UAS *dMyc*, UAS-*bsk*<sup>DN</sup>K53R (#9311), *sprouty*-LacZ [54], w1118, UAS-CD8GFP, UAS-CD4tdTOM. RNAis were validated with all the lines described above.

The proportion of flies that were either *repo*>*Dcr-2*>*Rho1* RNAi (Rho1RNAi) or *repo*>*Dcr-2*>*LacZ* (Control) versus control balancer flies was quantified in crossings, and converted in percentage lethality.

### Immunohistochemistry

Eye-antennal imaginal discs were dissected in cold Phosphate Buffer Saline (PBS) and fixed in 3.7% formaldehyde/PBS for 20 minutes. Immunostaining was performed using standard protocols<sup>55</sup>. Primary antibodies used were: mouse anti-*repo* antibody at 1:5 (8D12 anti-Repo, Developmental Studies Hybridoma Bank, DSHB), rat anti-*repo* at 1:1000 (a gift from Dr. Benjamin Altenhein, Institut für Genetik, Germany), rabbit anti-*repo* at 1:2000 (a gift from Dr. Benjamin Altenhein), rabbit anti-pH3 antibody at 1:1000 (Upstate), rat anti-Elav 1:100 (7E8A10 DSHB), goat anti-HRP antibody Cy5-conjugated at 1:100 (Jackson ImmunoResearch), rabbit anti-cleaved Caspase-3 at 1:200 (9661, Cell Signaling), rabbit anti-β-galactosidase antibody 1:2000 (Cappel, 55976, MP Biomedicals), rabbit anti-Laminin A antibody at 1:200 (a gift from Herwig O. Gutzeit) and mouse anti-Rho1 at 1:100 (p1D9, DSHB). Appropriate Alexa Fluor conjugated secondary antibodies used were from Molecular Probes. For Ethynyl deoxyuridine (EdU) experiments, dissected eye-antennal imaginal discs were incubated in 10 μM EdU/PBS for 10 minutes, at room temperature, washed with PBS and fixed as described above<sup>56</sup>. Alexa Fluor Azide detection was performed according to Click-iT EdU Fluor Imaging Kit (Invitrogen).



Images were obtained with the Leica SP5 confocal system and processed with Adobe Photoshop. Glial cells were counted, glia-covered eye disc area and glia nuclear area measured in Fiji. Mean and standard deviation were calculated for each case using GraphPad Prism.

#### Ploidy quantification

DAPI quantification protocol was described before<sup>14</sup>. DAPI staining was at 100 ng/ml DAPI in 1× PBS containing 0.1% Triton X-100 for 2 h at room temperature. DAPI fluorescence intensity was measured using Fiji software. The corrected total integrated density (CTCF) was calculated for each nucleus using the following function:  $CTCF = \text{integrated density} - (\text{area of selected nucleus} \times \text{mean fluorescence of background readings})$ . Background readings were made by measuring the fluorescence three times in regions in which no nuclei were present. Ploidy was then calculated by normalizing each glia (repo positive) nucleus to the average of 10 Elav-positive diploid photoreceptors, imaged on the same eye disc with the same laser settings.

#### Statistical analysis

To determine the statistical significance of the glial cell number, glia nuclear area, and C-value comparisons in Fig. 1 we applied a Mann–Whitney test. Statistical significance of the comparisons of perineurial glia and wrapping glia numbers between Control and Rho1 RNAi in Fig. 3G was done using 2-way ANOVA. Comparison of wrapping glia cell number between Control and Rho1 RNAi in Fig. 3J was done using Mann Whitney test. GraphPad Prism was used, p-value  $*=p<0.05$ ;  $**=p<0.01$ ;  $***=p<0.001$ ;  $****=p<0.0001$ . Error bars present in all graphs represent the standard deviation.

#### Electronic Microscopy

Electronic microscopy imaging was performed as previously reported<sup>2,57,58</sup>.

#### Acknowledgements

We thank Christian Klämbt, Herwig O. Gutzeit, Benjamin Altenhein, the Bloomington Drosophila Stock Center, the Vienna Drosophila RNAi Center, the Drosophila Genetic Resource Center, and the Developmental Studies Hybridoma Bank for reagents. We thank Emiliana Pereira and Pedro Silva for technical assistance. The authors acknowledge the support of the Advanced Light Microscopy (ALM) and Histology and Electron Microscopy (HEMS) i3S Scientific Platforms, members of the national infrastructure PPBI - Portuguese Platform of

Bioimaging (PPBI-POCI-01-0145-FEDER-022122). This work was funded by Norte-01-0145-FEDER-000008 - Porto Neurosciences and Neurologic Disease Research Initiative at I3S and Norte-01-0145-FEDER-000029 - Advancing Cancer Research: From basic knowledge to application, both supported by Norte Portugal Regional Operational Programme (NORTE 2020), under the PORTUGAL 2020 Partnership Agreement, through the European Regional Development Fund (FEDER). LT was by an FCT Postdoc Fellowship (SFRH/BPD/95336/2013).

## References

- 1 Silies, M. *et al.* Glial cell migration in the eye disc. *The Journal of neuroscience : the official journal of the Society for Neuroscience* **27**, 13130-13139, doi:10.1523/jneurosci.3583-07.2007 (2007).
- 2 Tavares, L. *et al.* Drosophila PS2 and PS3 integrins play distinct roles in retinal photoreceptors-glia interactions. *Glia* **63**, 1155-1165, doi:10.1002/glia.22806 (2015).
- 3 Xie, X., Gilbert, M., Petley-Ragan, L. & Auld, V. J. Loss of focal adhesions in glia disrupts both glial and photoreceptor axon migration in the Drosophila visual system. *Development* **141**, 3072-3083, doi:10.1242/dev.101972 (2014).
- 4 Kim, S. N. *et al.* ECM stiffness regulates glial migration in Drosophila and mammalian glioma models. *Development* **141**, 3233-3242, doi:10.1242/dev.106039 (2014).
- 5 Hummel, T., Attix, S., Gunning, D. & Zipursky, S. L. Temporal control of glial cell migration in the Drosophila eye requires gilgamesh, hedgehog, and eye specification genes. *Neuron* **33**, 193-203 (2002).
- 6 Avet-Rochex, A., Kaul, A. K., Gatt, A. P., McNeill, H. & Bateman, J. M. Concerted control of gliogenesis by InR/TOR and FGF signalling in the Drosophila post-embryonic brain. *Development* **139**, 2763-2772, doi:10.1242/dev.074179 (2012).
- 7 Awasaki, T., Lai, S. L., Ito, K. & Lee, T. Organization and postembryonic development of glial cells in the adult central brain of Drosophila. *The Journal of neuroscience : the official journal of the Society for Neuroscience* **28**, 13742-13753, doi:10.1523/jneurosci.4844-08.2008 (2008).
- 8 Bauke, A. C., Sasse, S., Matzat, T. & Klambt, C. A transcriptional network controlling glial development in the Drosophila visual system. *Development* **142**, 2184-2193, doi:10.1242/dev.119750 (2015).

- 9 Tavares, L., Correia, A., Santos, M. A., Relvas, J. B. & Pereira, P. S. dMyc is required in retinal progenitors to prevent JNK-mediated retinal glial activation. *PLoS genetics* **13**, e1006647, doi:10.1371/journal.pgen.1006647 (2017).
- 10 Reddy, B. V. & Irvine, K. D. Regulation of Drosophila glial cell proliferation by Merlin-Hippo signaling. *Development* **138**, 5201-5212, doi:10.1242/dev.069385 (2011).
- 11 Rangarajan, R., Courvoisier, H. & Gaul, U. Dpp and Hedgehog mediate neuron-glia interactions in Drosophila eye development by promoting the proliferation and motility of subretinal glia. *Mechanisms of development* **108**, 93-103 (2001).
- 12 Unhavaithaya, Y. & Orr-Weaver, T. L. Polyploidization of glia in neural development links tissue growth to blood-brain barrier integrity. *Genes Dev* **26**, 31-36, doi:10.1101/gad.177436.111 (2012).
- 13 Von Stetina, J. R., Frawley, L. E., Unhavaithaya, Y. & Orr-Weaver, T. L. Variant cell cycles regulated by Notch signaling control cell size and ensure a functional blood-brain barrier. *Development* **145**, doi:10.1242/dev.157115 (2018).
- 14 Zulbahar, S. *et al.* Differential expression of Obek controls ploidy in the Drosophila blood-brain barrier. *Development* **145**, doi:10.1242/dev.164111 (2018).
- 15 Silies, M., Yuva-Aydemir, Y., Franzdottir, S. R. & Klambt, C. The eye imaginal disc as a model to study the coordination of neuronal and glial development. *Fly* **4**, 71-79 (2010).
- 16 Chang, Y. C., Tsao, C. K. & Sun, Y. H. Temporal and spatial order of photoreceptor and glia projections into optic lobe in Drosophila. *Scientific reports* **8**, 12669, doi:10.1038/s41598-018-30415-8 (2018).
- 17 Chen, Y., Cameron, S., Chang, W. T. & Rao, Y. Turtle interacts with borderless in regulating glial extension and axon ensheathment. *Molecular brain* **10**, 17, doi:10.1186/s13041-017-0299-6 (2017).
- 18 Raftopoulou, M. & Hall, A. Cell migration: Rho GTPases lead the way. *Dev Biol* **265**, 23-32 (2004).
- 19 Van Aelst, L. & Symons, M. Role of Rho family GTPases in epithelial morphogenesis. *Genes Dev* **16**, 1032-1054, doi:10.1101/gad.978802 (2002).
- 20 Haga, R. B. & Ridley, A. J. Rho GTPases: Regulation and roles in cancer cell biology. *Small GTPases* **7**, 207-221, doi:10.1080/21541248.2016.1232583 (2016).
- 21 Etienne-Manneville, S. & Hall, A. Rho GTPases in cell biology. *Nature* **420**, 629-635, doi:10.1038/nature01148 (2002).

- 22 Tan, D. *et al.* Inhibition of RhoA-Subfamily GTPases Suppresses Schwann Cell Proliferation Through Regulating AKT Pathway Rather Than ROCK Pathway. *Frontiers in cellular neuroscience* **12**, 437, doi:10.3389/fncel.2018.00437 (2018).
- 23 Wen, J. *et al.* RhoA regulates Schwann cell differentiation through JNK pathway. *Experimental neurology* **308**, 26-34, doi:10.1016/j.expneurol.2018.06.013 (2018).
- 24 Liang, X., Draghi, N. A. & Resh, M. D. Signaling from integrins to Fyn to Rho family GTPases regulates morphologic differentiation of oligodendrocytes. *The Journal of neuroscience : the official journal of the Society for Neuroscience* **24**, 7140-7149, doi:10.1523/jneurosci.5319-03.2004 (2004).
- 25 Ackerman, S. D., Garcia, C., Piao, X., Gutmann, D. H. & Monk, K. R. The adhesion GPCR Gpr56 regulates oligodendrocyte development via interactions with Galpha12/13 and RhoA. *Nature communications* **6**, 6122, doi:10.1038/ncomms7122 (2015).
- 26 Sepp, K. J. & Auld, V. J. Reciprocal interactions between neurons and glia are required for Drosophila peripheral nervous system development. *The Journal of neuroscience : the official journal of the Society for Neuroscience* **23**, 8221-8230 (2003).
- 27 Sepp, K. J. & Auld, V. J. RhoA and Rac1 GTPases mediate the dynamic rearrangement of actin in peripheral glia. *Development* **130**, 1825-1835 (2003).
- 28 Ho, T. Y. *et al.* Expressional Profiling of Carpet Glia in the Developing Drosophila Eye Reveals Its Molecular Signature of Morphology Regulators. *Frontiers in neuroscience* **13**, 244, doi:10.3389/fnins.2019.00244 (2019).
- 29 Prokopenko, S. N. *et al.* A putative exchange factor for Rho1 GTPase is required for initiation of cytokinesis in Drosophila. *Genes Dev* **13**, 2301-2314, doi:10.1101/gad.13.17.2301 (1999).
- 30 Rosa, A., Vlassaks, E., Pichaud, F. & Baum, B. Ect2/Pbl acts via Rho and polarity proteins to direct the assembly of an isotropic actomyosin cortex upon mitotic entry. *Dev Cell* **32**, 604-616, doi:10.1016/j.devcel.2015.01.012 (2015).
- 31 Matthews, H. K. *et al.* Changes in Ect2 localization couple actomyosin-dependent cell shape changes to mitotic progression. *Dev Cell* **23**, 371-383, doi:10.1016/j.devcel.2012.06.003 (2012).
- 32 Hacker, U. & Perrimon, N. DRhoGEF2 encodes a member of the Dbl family of oncogenes and controls cell shape changes during gastrulation in Drosophila. *Genes Dev* **12**, 274-284, doi:10.1101/gad.12.2.274 (1998).

- 33 Azevedo, D. *et al.* DRhoGEF2 regulates cellular tension and cell pulsations in the Amnioserosa during *Drosophila* dorsal closure. *PloS one* **6**, e23964, doi:10.1371/journal.pone.0023964 (2011).
- 34 Golding, A. E., Visco, I., Bieling, P. & Bement, W. M. Extraction of active RhoGTPases by RhoGDI regulates spatiotemporal patterning of RhoGTPases. *Elife* **8**, doi:10.7554/eLife.50471 (2019).
- 35 Castrillon, D. H. & Wasserman, S. A. Diaphanous is required for cytokinesis in *Drosophila* and shares domains of similarity with the products of the limb deformity gene. *Development* **120**, 3367-3377 (1994).
- 36 Mizuno, T., Amano, M., Kaibuchi, K. & Nishida, Y. Identification and characterization of *Drosophila* homolog of Rho-kinase. *Gene* **238**, 437-444, doi:10.1016/s0378-1119(99)00351-0 (1999).
- 37 Ishizaki, T. *et al.* The small GTP-binding protein Rho binds to and activates a 160 kDa Ser/Thr protein kinase homologous to myotonic dystrophy kinase. *Embo j* **15**, 1885-1893 (1996).
- 38 Yamashiro, S. *et al.* Citron kinase, a Rho-dependent kinase, induces di-phosphorylation of regulatory light chain of myosin II. *Molecular biology of the cell* **14**, 1745-1756, doi:10.1091/mbc.e02-07-0427 (2003).
- 39 Hickson, G. R. & O'Farrell, P. H. Rho-dependent control of anillin behavior during cytokinesis. *The Journal of cell biology* **180**, 285-294, doi:10.1083/jcb.200709005 (2008).
- 40 Piekny, A. J. & Glotzer, M. Anillin is a scaffold protein that links RhoA, actin, and myosin during cytokinesis. *Current biology : CB* **18**, 30-36, doi:10.1016/j.cub.2007.11.068 (2008).
- 41 Echard, A., Hickson, G. R., Foley, E. & O'Farrell, P. H. Terminal cytokinesis events uncovered after an RNAi screen. *Current biology : CB* **14**, 1685-1693, doi:10.1016/j.cub.2004.08.063 (2004).
- 42 Madaule, P. *et al.* Role of citron kinase as a target of the small GTPase Rho in cytokinesis. *Nature* **394**, 491-494, doi:10.1038/28873 (1998).
- 43 Davoli, T. & de Lange, T. The causes and consequences of polyploidy in normal development and cancer. *Annual review of cell and developmental biology* **27**, 585-610, doi:10.1146/annurev-cellbio-092910-154234 (2011).

- 44 Lordier, L. *et al.* Megakaryocyte endomitosis is a failure of late cytokinesis related to defects in the contractile ring and Rho/Rock signaling. *Blood* **112**, 3164-3174, doi:10.1182/blood-2008-03-144956 (2008).
- 45 Gao, Y. *et al.* Role of RhoA-specific guanine exchange factors in regulation of endomitosis in megakaryocytes. *Dev Cell* **22**, 573-584, doi:10.1016/j.devcel.2011.12.019 (2012).
- 46 Gerlach, S. U., Eichenlaub, T. & Herranz, H. Yorkie and JNK Control Tumorigenesis in Drosophila Cells with Cytokinesis Failure. *Cell reports* **23**, 1491-1503, doi:10.1016/j.celrep.2018.04.006 (2018).
- 47 Cong, B., Ohsawa, S. & Igaki, T. JNK and Yorkie drive tumor progression by generating polyploid giant cells in Drosophila. *Oncogene* **37**, 3088-3097, doi:10.1038/s41388-018-0201-8 (2018).
- 48 Grendler, J., Lowgren, S., Mills, M. & Losick, V. P. Wound-induced polyploidization is driven by Myc and supports tissue repair in the presence of DNA damage. *Development* **146**, doi:10.1242/dev.173005 (2019).
- 49 Ganem, N. J. *et al.* Cytokinesis failure triggers hippo tumor suppressor pathway activation. *Cell* **158**, 833-848, doi:10.1016/j.cell.2014.06.029 (2014).
- 50 Roy, A. *et al.* Uncoupling of the Hippo and Rho pathways allows megakaryocytes to escape the tetraploid checkpoint. *Haematologica* **101**, 1469-1478, doi:10.3324/haematol.2016.149914 (2016).
- 51 Sasse, S., Neuert, H. & Klambt, C. Differentiation of Drosophila glial cells. *Wiley interdisciplinary reviews. Developmental biology* **4**, 623-636, doi:10.1002/wdev.198 (2015).
- 52 Schwabe, T., Bainton, R. J., Fetter, R. D., Heberlein, U. & Gaul, U. GPCR signaling is required for blood-brain barrier formation in drosophila. *Cell* **123**, 133-144, doi:10.1016/j.cell.2005.08.037 (2005).
- 53 Sieglitz, F. *et al.* Antagonistic feedback loops involving Rau and Sprouty in the Drosophila eye control neuronal and glial differentiation. *Sci Signal* **6**, ra96, doi:10.1126/scisignal.2004651 (2013).
- 54 Barrett, K., Leptin, M. & Settleman, J. The Rho GTPase and a Putative RhoGEF Mediate a Signaling Pathway for the Cell Shape Changes in Drosophila Gastrulation. *Cell* **91**, 905-915, doi:[https://doi.org/10.1016/S0092-8674\(00\)80482-1](https://doi.org/10.1016/S0092-8674(00)80482-1) (1997).
- 55 Marinho, J., Martins, T., Neto, M., Casares, F. & Pereira, P. S. The nucleolar protein Vriato/Nol12 is required for the growth and differentiation progression activities of

- the Dpp pathway during *Drosophila* eye development. *Dev Biol* **377**, 154-165, doi:10.1016/j.ydbio.2013.02.003 (2013).
- 56 Eusebio, N., Tavares, L. & Pereira, P. S. CtBP represses Dpp-dependent Mad activation during *Drosophila* eye development. *Dev Biol* **442**, 188-198, doi:10.1016/j.ydbio.2018.07.018 (2018).
- 57 Marinho, J., Casares, F. & Pereira, P. S. The *Drosophila* *Noll2* homologue *viriato* is a dMyc target that regulates nucleolar architecture and is required for dMyc-stimulated cell growth. *Development* **138**, 349-357, doi:10.1242/dev.054411 (2011).
- 58 Martins, T. *et al.* TGF $\beta$ /Activin signalling is required for ribosome biogenesis and cell growth in *Drosophila* salivary glands. *Open Biology* **7**, doi:10.1098/rsob.160258 (2017).

## Figure Legends

### **Fig. 1. *Rho1* loss-of-function in glia causes a switch from mitosis to endoreplication.**

A) Schematic representation of the *Drosophila* eye imaginal disc and optic lobe (OL) indicating the different glial cells observed, namely perineurial glia (PG) and subperineurial glia (SPG). White dashed line surrounds the eye disc and optic lobe (OL). Yellow dashed line represents the morphogenetic furrow (MF). White lines represent photoreceptor (PR) axons.

(B) Control eye disc showing glia staining by Repo (red) and photoreceptor (PR) axons by Hrp (grey). (C) Control transversal cut of the OS showing PG nuclei surrounding PR axons. (D) Control (*repo4.3>CD8GFP>LacZ*), (E) *Rho1* RNAi (*repo4.3>CD8GFP>Rho1* RNAi) and (F) *Rho1* dominant-negative (DN; *repo4.3>CD8GFP>Rho1<sup>DN</sup>*). Glia membranes (Repo>CD8GFP) are shown in green demonstrating no differences in the area occupied by glia. D' – F' are magnification of glia staining with Repo (red) showing increased nuclear area in *Rho1* LOF. DAPI stains DNA in blue. Scale bars correspond to 10  $\mu$ m. (G) Graph showing glial cell number in Control (*repo>Dcr-2>LacZ*, n=19) and *Rho1* RNAi (*repo>Dcr-2>Rho1* RNAi, n=10) from eye discs with 7 to 12 Photoreceptor rows (PhR). Mann-Whitney test with  $p < 0.0001$ . (H) Graph representing retinal glia C-value (ploidy) in Control (*repo>Dcr-2>LacZ*, n=6) and *Rho1* RNAi (*repo>Dcr-2>Rho1* RNAi, n=10) from eye discs with 7 to 12 PhR. (I) Graph showing the % of lethality in Control (*repo>Dcr-2>LacZ*) and *Rho1* RNAi (*repo>Dcr-2>Rho1* RNAi).

**Fig. 2. The Pebble/Rho1/Anillin pathway regulates the glia ploidy level in the eye disc, which is modulated by Yki and Myc levels**

(A – F) RNAi for most common regulators of Rho GTPase signaling. (A) *pbl* RNAi (*repo4.3>CD8GFP>pbl* RNAi #1093015) (B) *RhoGEF2* RNAi (*repo4.3>CD8GFP>RhoGEF2* RNAi #110577) (C) *RhoGDI* RNAi (*repo4.3>CD8GFP>RhoGDI* RNAi #105765) (D) *scra* RNAi (*anillin; repo>Dcr-2>scra* RNAi # 53358) (E) *Rok*<sup>CAT</sup> (*repo4.3>CD8GFP>Rok*<sup>CAT7.1</sup> #6668) (F) *Rok* RNAi (*repo4.3>CD8GFP>Rok* RNAi #3793). (G) *Rho1* RNAi>*bsk*<sup>DN</sup> does not alter *Rho1* RNAi phenotype (*repo4.3>CD8GFP>Rho1* RNAi>*bsk*<sup>DN</sup> #6409). (H - I) Cleaved Caspase-3 (C3) staining (green) in (H) Control (*repo>Dcr-2>LacZ*) and (I) *Rho1* RNAi (*repo>Dcr-2>Rho1* RNAi). EdU staining (grey) in (J) Control (*repo>Dcr-2>LacZ*) and (K) *Rho1* RNAi (*repo>Dcr-2>Rho1* RNAi). (J' - K') show EdU staining in grey. Arrowheads point towards EdU staining in retinal glia. % of EdU positive retinal glia are indicated (n=6 in control and n=8 in *Rho1* RNAi eye discs with 7-11 PhR; \*\*p=0.0027). (L-M) Growth induced by dMyc and yki activation increased the ploidy of *Rho1* depleted glial cells (L) *Rho1* RNAi>*yki*<sup>ACT</sup> (*repo4.3>CD8GFP>Rho1* RNAi>*yki*<sup>ACT</sup>) (M) *Rho1* RNAi>*dMyc* (*repo4.3>CD8GFP>Rho1* RNAi>*dMyc*).

Repo staining (glia) is shown in red. Hrp is shown in grey, except for J and K (grey corresponds to EdU). (G, L, M) green corresponds to glial cell membranes (CD8GFP). White dashed line surrounds the eye disc. DAPI stains DNA in blue. Scale bars correspond to 10  $\mu$ m.

**Fig. 3. Rho1 functions in perineurial glia to inhibit eye-disc glia polyploidization.**

A - B) *Rho1* LOF in SPG (B, *moody>Rho1*<sup>DN</sup>) show a similar phenotype as control (A, *moody>LacZ*). Arrows points to SPG nuclei. (C) Perineurial glia *Rho1*<sup>DN</sup> (*c527>Rho1*<sup>DN</sup>) demonstrates a phenotype similar with pan glia *Rho1* LOF. Nuclear size is increased in the eye disc (arrowheads) while in the brain lobe the glia nuclear size (asterisk) remains similar to control (A'). A' – C' shows glia in red. (D) *c527>P2A-GFP>Rho1*<sup>DN</sup> showing differences in glia nuclear size between the eye optic stalk (OS; arrows) and the optic lobe (OL; asterisk). D' shows glia in red and perineurial glia membranes in green. (E, F) Wrapping glia (Mz97 expressing cells) are shown in green in Control (E; *Mz97>Stinger>LacZ*) and *Rho1*<sup>DN</sup> (F; *Mz97>Stinger>Rho1*<sup>DN</sup>). (G) Graph representing perineurial glia (PG) and wrapping glia (WG) cell numbers in Control (*Mz97>Stinger>LacZ*) and *Rho1*<sup>DN</sup> (*Mz97>Stinger>Rho1*<sup>DN</sup>). Average of 5 eye imaginal discs. 2-way ANOVA statistics. (H - I) Wrapping glial cells are labelled by  $\beta$ -galactosidase from *sprouty-LacZ* (*sty-Z*; green) in (H) control (*repo>Dcr-2>sty-*



Z) and (I) *Rho1* RNAi (*repo>Dcr-2>sty-Z>Rho1* RNAi #29002). (J) Graph showing the percentage of wrapping glia (sty-positive) in Control and *Rho1* RNAi (genotypes as H and I). Average of 10 eye imaginal discs in control and 6 eye imaginal discs in *Rho1* RNAi. Mann Whitney test statistics; \*\* p=0.0016. Glia is stained by Repo in red. DNA was counterstained with DAPI (blue). Scale bars correspond to 10  $\mu$ m.

#### **Fig. 4. *Rho1* knockdown causes wrapping defects in the optic stalk.**

A - B) Optic stalks of (A) control (*repo>Dcr-2>sty-Z*) and (B) *Rho1* RNAi (*repo>Dcr-2>sty-Z>Rho1* RNAi #29002) labelled with  $\beta$ -galactosidase to detect *sprouty*-LacZ (*sty-Z*; green). C) Control (*repo4.3>CD8GFP>LacZ*) and (D) *Rho1* RNAi (*repo4.3>CD8GFP>Rho1* RNAi). Repo>CD8GFP is shown in red (C' and D') and photoreceptor axons are stained by Hrp and shown in grey (C'' and D''). (E, G and I) Control (*repo>Dcr-2>LacZ*) and (F, H and J) *Rho1* RNAi (*repo>Dcr-2>Rho1* RNAi) transversal cut of the OS. Laminin A (LanA) is shown in green and glia nuclei (Repo) and membranes (Repo>CD8GFP) in red. Hrp stains photoreceptor axons in grey. Transversal cut of the OS analysis by TEM from (K and M) Control (*repo>Dcr-2>LacZ*) and (L and N) *Rho1* RNAi (*repo>Dcr-2>Rho1* RNAi). Wrapping glia (blue) enwraps each R1-R8 ommatidia laying apical to subperineurial glia (SPG; green). Perineurial glial cells (PG; lilac) form a layer externally to the SPG. In *Rho1* RNAi instead of PG and SPG layer, only a single glia layer is visible (SPG-like in pink). Glia (repo) is shown in red. (A – J) Scale bars correspond to 10  $\mu$ m. (K – N) Scale bars correspond to 1  $\mu$ m.

#### **Supp. Figure Legends**

##### **Fig. S1. *Rho1* loss-of-function (LOF) in the eye imaginal disc**

*Ey>Dcr-2>Rho1* RNAi eye imaginal discs show almost absence of differentiation, in comparison with Control. Glia is stained by Repo (red) and photoreceptor (PR) axons by Hrp (grey). Inlet (dashed line) shows pyknotic (apoptotic) nuclei (arrows). DAPI stains DNA in blue. Scale bars correspond to 10  $\mu$ m.

##### **Fig. S2. *Rho1*-depleted retinal glia initiate mitosis**

Presence of Phospho-Histone H3 (pH3) staining (green) in Control (*repo>Dcr-2>LacZ*) and *Rho1* RNAi (*repo>Dcr-2>Rho1* RNAi). Glia is stained by Repo (red) and photoreceptor (PR) axons by Hrp (grey). DAPI stains DNA in blue. Scale bars correspond to 10  $\mu$ m.

**Fig. S3. *Rho1* expression in glial cells**

A) *Rho1* expression detected by an  $\alpha$ -*Rho1* antibody (green) in retinal glia. Perineurial glia membranes can be identified by *c527>CD4tdTOM* in grey. Glia nuclei are shown in red. *Rho1* staining is visible in the outermost glia membrane corresponding to perineurial glia (arrows).

B) *Rho1* expression detected by an  $\alpha$ -*Rho1* antibody (green) in subperineurial glia. Subperineurial glia membranes can be identified by *moody>CD8GFP* in red. Perineurial glia expression is also visible (PG arrow).

C) *Rho1*-GFP trap line showing *Rho1* expression (green) in the outermost glia layer of the optic stalk corresponding to perineurial glia cells (PG). Glia is stained by *Repo* (red). Scale bars correspond to 10  $\mu$ m.

**Fig. 1**

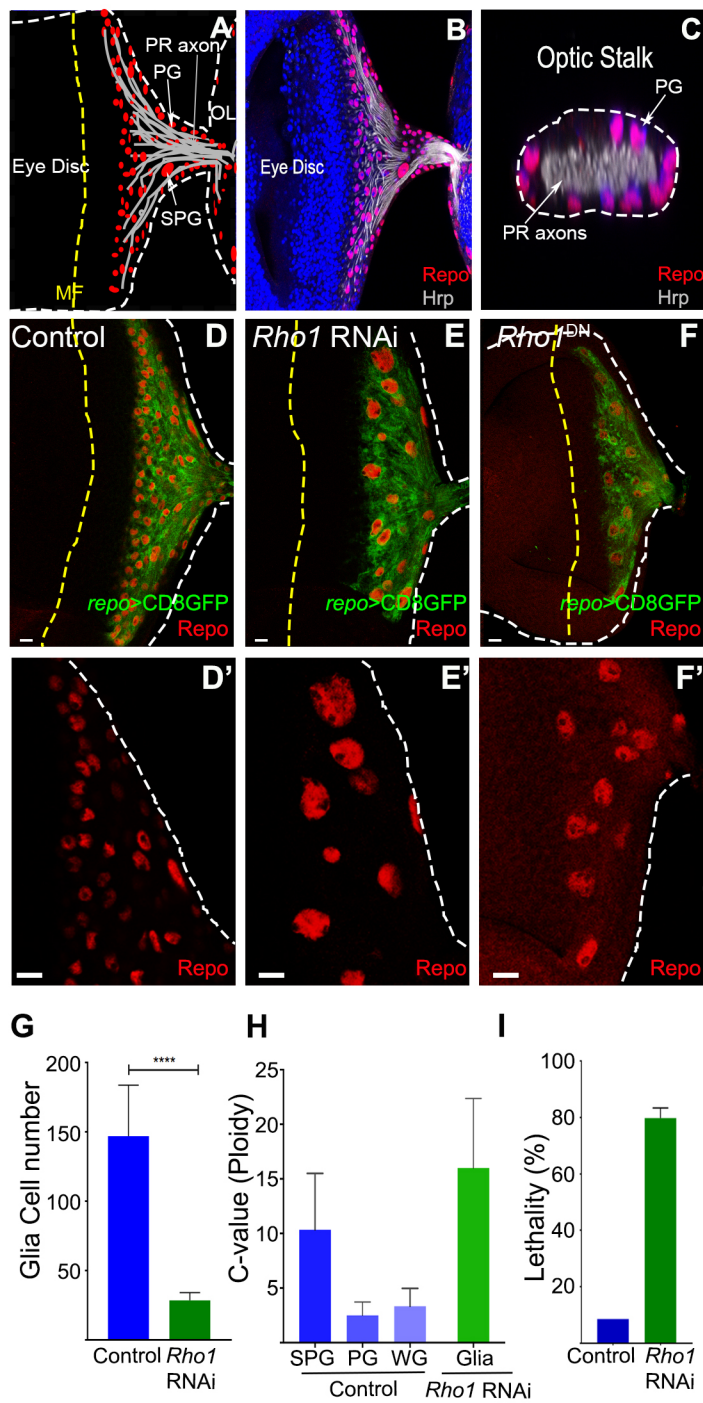

Fig. 2

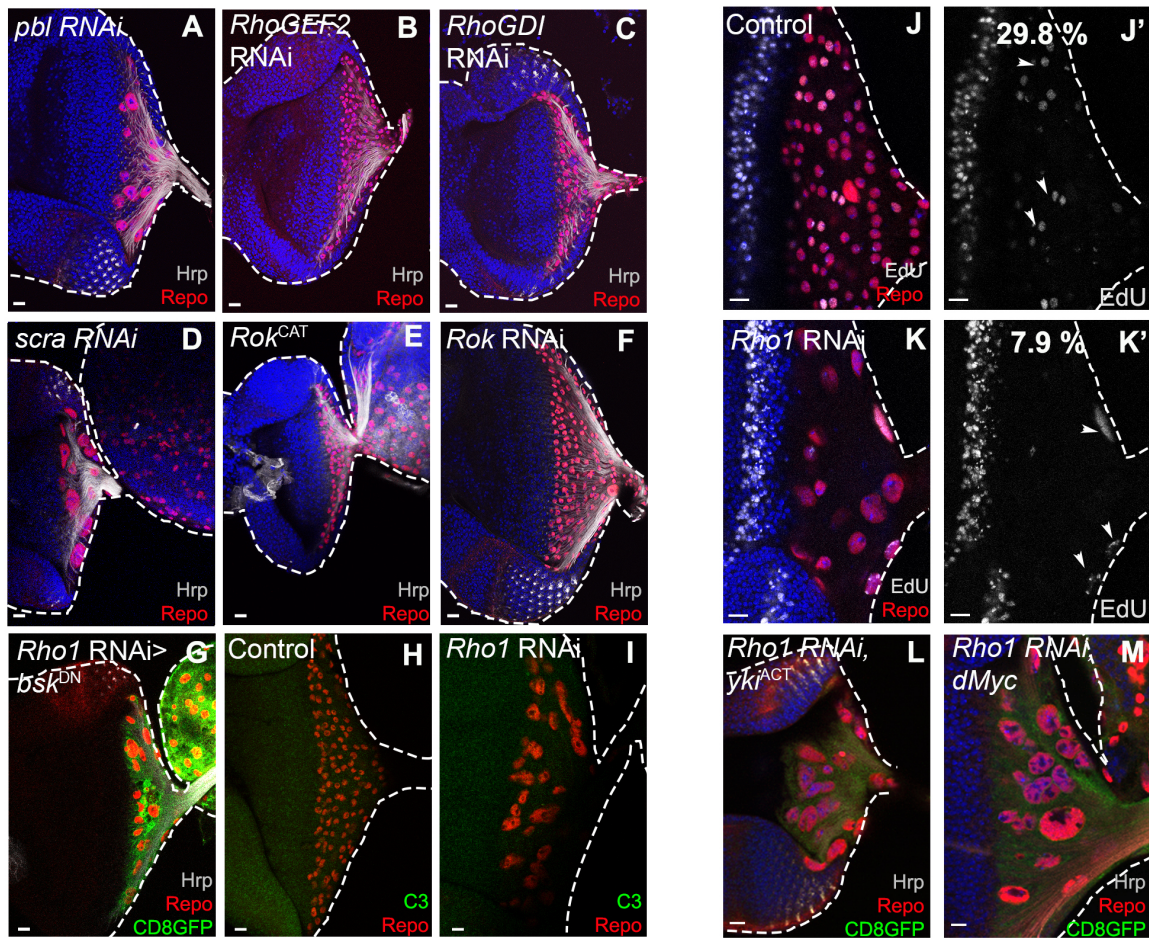

**Fig. 3**

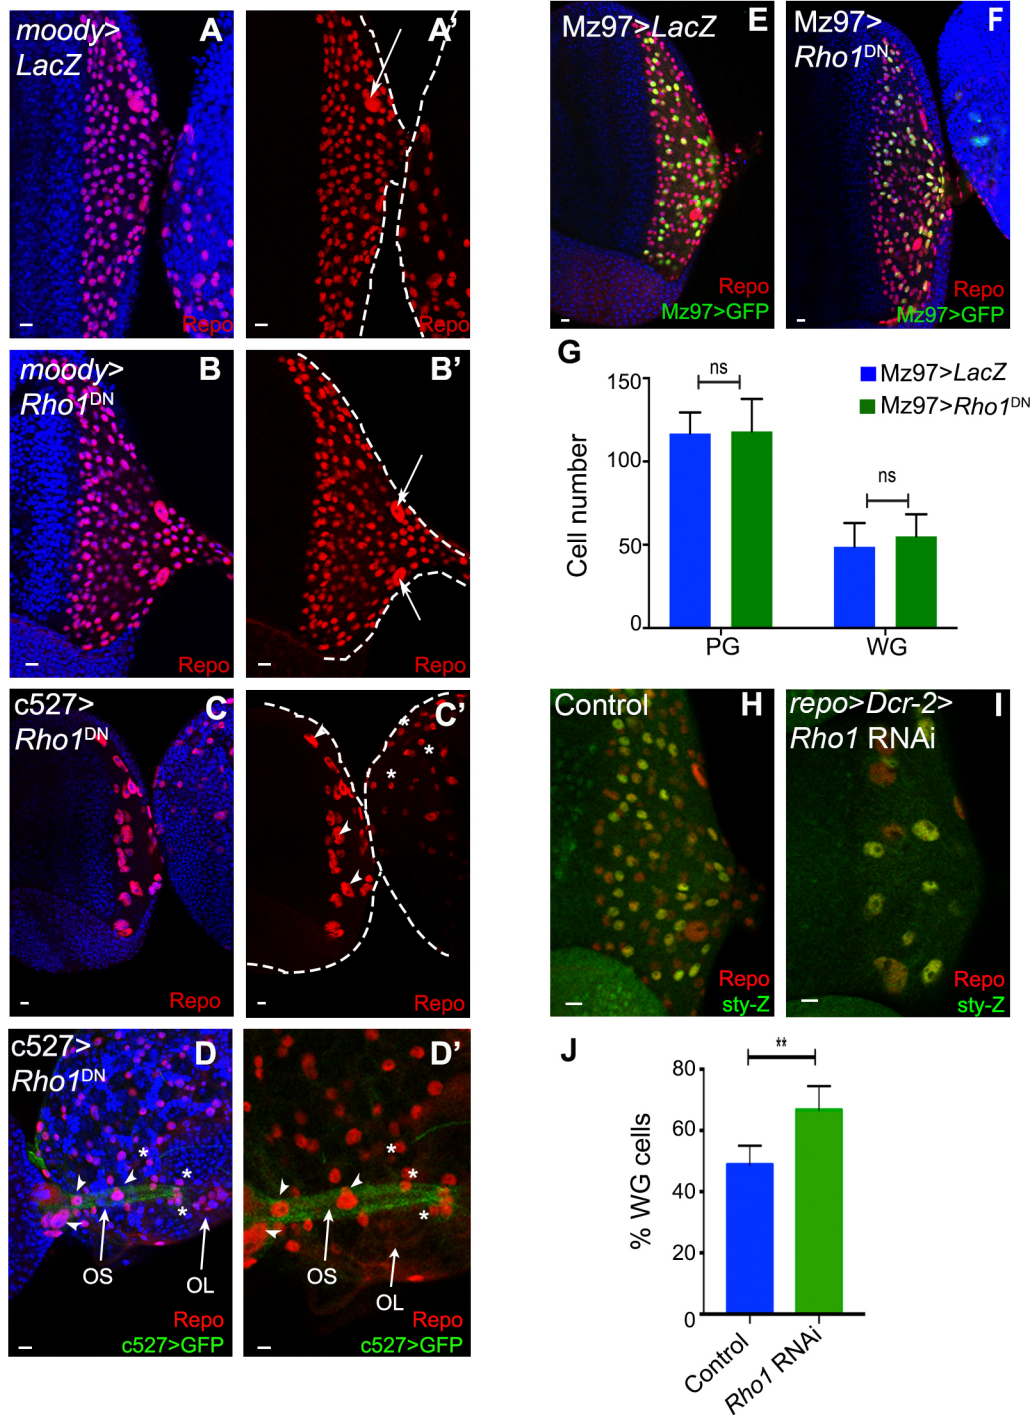

Fig. 4

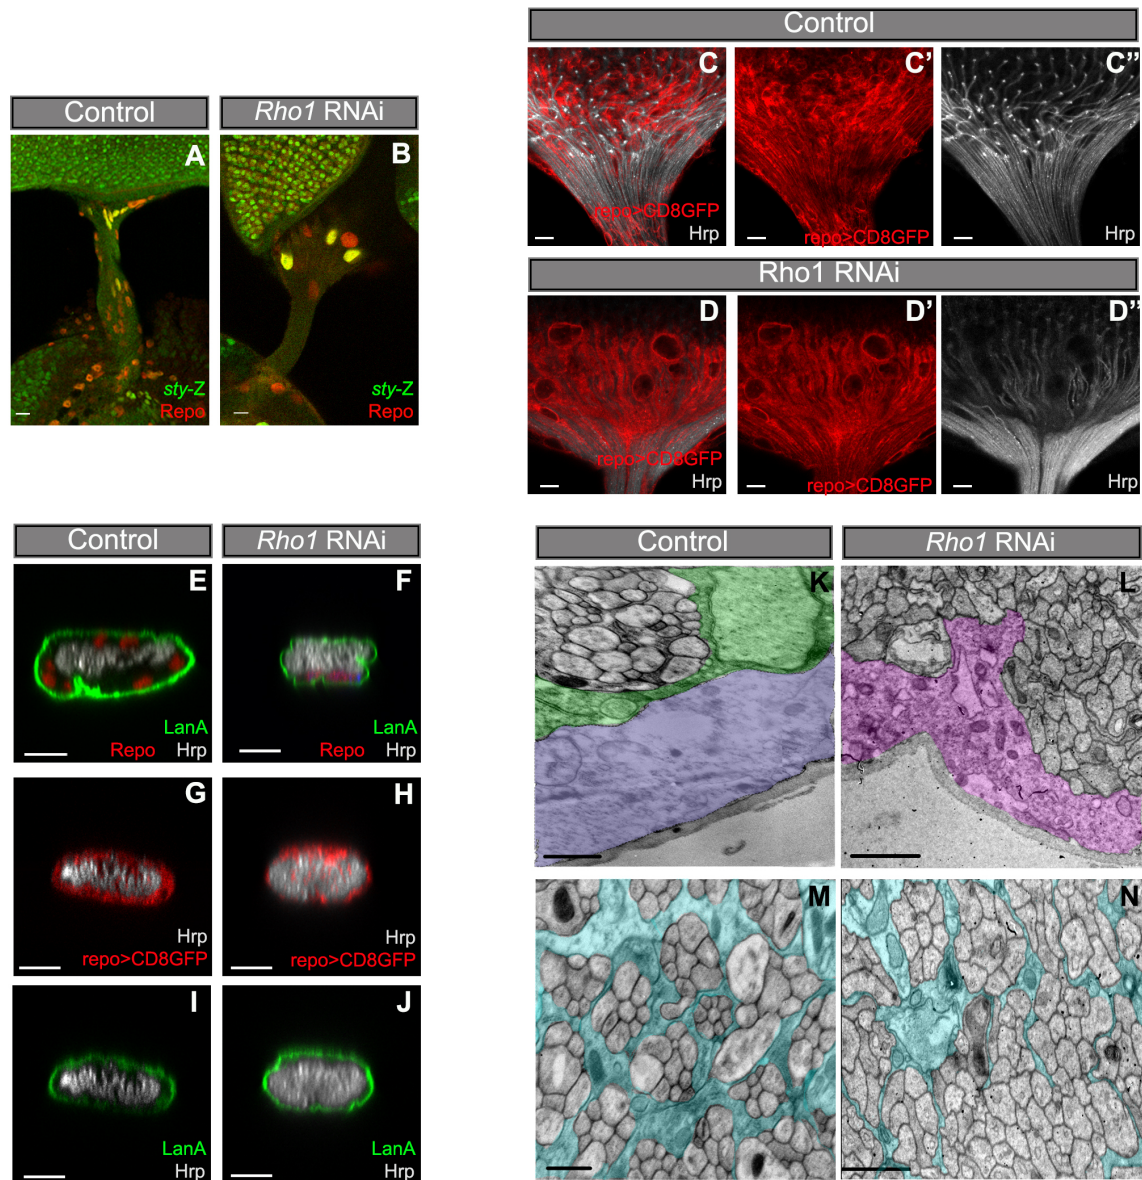

**Fig. S1**

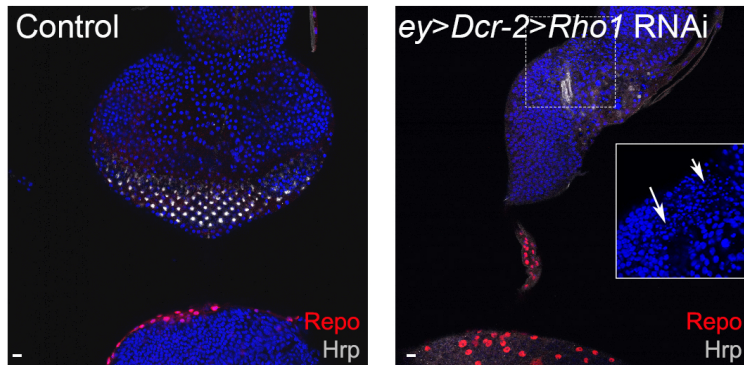

**Fig. S2**

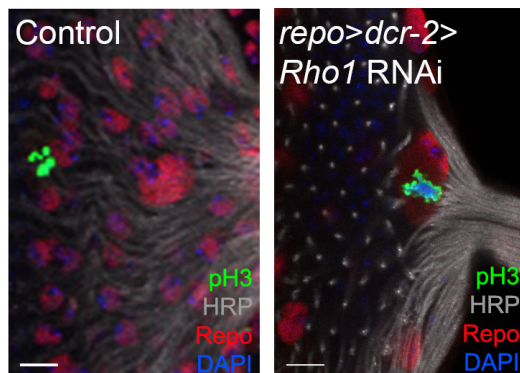

Fig. S3

A

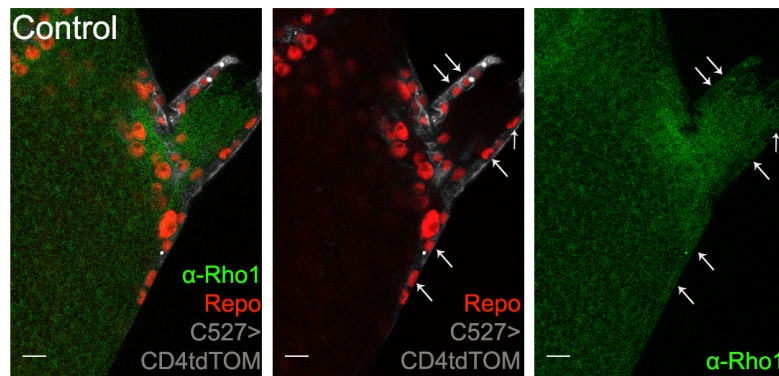

B

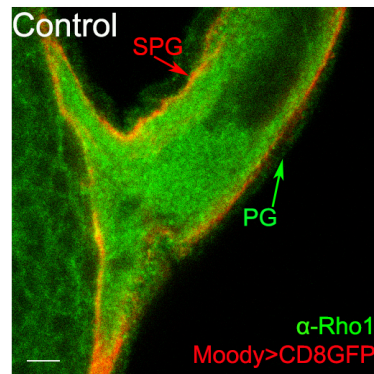

C

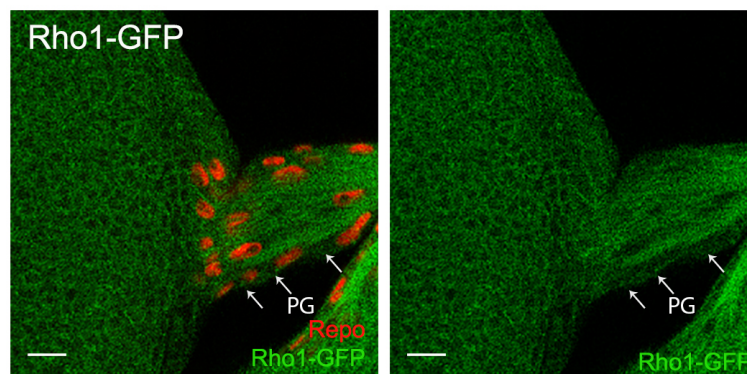

Source: https://www.biorxiv.org/content/10.1101/2020.02.12.945600v1.full.pdf
